# Supplementary material for: Rheb1 promotes tumor progression through mTORC1 in MLL-AF9-initiated murine acute myeloid leukemia
Source: J Hematol Oncol. 2016 Apr 12;9:36. doi: 10.1186/s13045-016-0264-3 (PMC4830070; doi:10.1186/s13045-016-0264-3)
Supplement: Additional file 1: Figure S1. — The correlation of Rheb1 expression level with AML prognosis. (A) Kaplan-Meier event-free survival curves of AML patients, with low (≤50 % quantile, n = 426) and high (>50 % quantile, n = 3) expression based on Verhaak et al.’s dataset. (B) Kaplan-Meier overall survival curves of AML patients, w/o Rheb1 deletion based on the cBioPortal database. Figure S2. The genotype of established AML mouse model. (A) Western blotting of Rheb1 protein level in WT and AML cells (n = 3). (B) Flow cytometric analysis of AML cells. (C) Rheb1 mRNA expression of AML cells. (D) PCR genotype of AML mice. (E) Histopathological analysis of the spleens in AML mice. (F) Gating strategy for L-GMPs in the spleen. (G) L-GMP frequency in the spleen (n = 4). (H) The percentages of AML subpopulations in the spleen (n = 4). The data are the mean numbers ± SEM. Figure S3. The function and related signaling pathway of AML cells. (A) GFP+ cells homing to the BM (left panel) and spleen (right panel), n = 5. (B) The differentially expressed genes of AML cells. (C) Enrichment of M phase mitotic cell cycle-related genes in GFP+ cells. (D and E) The cell cycle status of K+G+ (D) and K−G+ cells (E) (n = 4). (F and G) The mRNA levels of the indicated genes in GFP+ (F) and K+G− cells (G). The data are the mean numbers ± SEM. (H and I) The normalized MFI of p-S6 (H) and p-4E-BP1 (I) of K+G+ and K−G+ cells in the BM (n = 4). The data are the mean numbers ± SEM. Figure S4. The signaling pathway in human and murine AML. (A and B) mTOR (A) and 4E-BP1 (B) mRNA expression of human AML cells in the HemaExplorer database. (C and D) KEGG analysis of the upregulated (C) and downregulated (D) pathways in Rheb1 Δ/Δ vs Rheb1 fl/fl GFP+ cells. Table S1. Primer sequence list. (PDF 30124 kb) [file 13045_2016_264_MOESM1_ESM.pdf]

## SUPPLEMENTARY FIGURE LEGENDS

### **Figure S1 The correlation of Rheb1 expression level with AML prognosis.**

(A) Kaplan-Meier curves of event-free survival of patients with AML, with low expression ( $\leq 50\%$  quantile,  $n = 426$ ) and high expression ( $> 50\%$  quantile,  $n = 3$ ) based on Verhaak *et al.*'s dataset. (B) Kaplan-Meier curves of overall survival of patients with AML, with or without Rheb1 deletion based on TCGA data in the cBioportal database.

**Figure S2 The genotype of established AML mouse model.** (A) Western blotting analysis of Rheb1 protein level in WT and AML cells and their densitometry value using  $\beta$ -actin as an internal control ( $n = 3$ ). (B) Flow cytometric analysis of GFP<sup>+</sup> AML cells using CD3, B220 and CD11b. (C) Rheb1 mRNA expression of *Rheb1<sup>fl/fl</sup>* and *Rheb1 $\Delta/\Delta$*  AML cells. (D) PCR confirmation of the genotype of mice. (E) Histopathological analysis of spleen sections in *Rheb1<sup>fl/fl</sup>* and *Rheb1 $\Delta/\Delta$*  AML mice. (F) Gating strategy for measuring L-GMP frequencies in the spleens of *Rheb1<sup>fl/fl</sup>* and *Rheb1 $\Delta/\Delta$*  AML mice. (G) L-GMP frequency in the spleen ( $n = 4$ ). (H) The percentages of AML subpopulations using c-Kit and Gr-1 in the spleen ( $n = 4$ ). The data are presented as the mean numbers  $\pm$  SEM.

**Figure S3 The function and related signaling pathway of AML cells.** (A) GFP<sup>+</sup> cells homing to the BM (left panel) and spleen (right panel),  $n = 5$ . (B) The differentially expressed genes of *Rheb1<sup>fl/fl</sup>* and *Rheb1 $\Delta/\Delta$*  AML cells. (C) Enrichment of M phase mitotic cell cycle-related genes in *Rheb1<sup>fl/fl</sup>* vs.

*Rheb1<sup>Δ/Δ</sup>* GFP<sup>+</sup> cells. NES (normalized enrichment score), and the P values are indicated in each plot. (D and E) The cell cycle status of K<sup>+</sup>G<sup>+</sup> (D) and K<sup>+</sup>G<sup>-</sup> cells (E) (n = 4). (F and G) The mRNA expression levels of the indicated genes in GFP<sup>+</sup> (F) and K<sup>+</sup>G<sup>-</sup> cells (G). The GFP<sup>+</sup> cells were sorted, and the RNA was isolated for RT-PCR using the indicated gene primers. The data are presented as the mean numbers ± SEM. (H and I) The normalized MFI of p-S6 (H) and p-4E-BP1 (I) of K<sup>+</sup>G<sup>+</sup> and K<sup>+</sup>G<sup>-</sup> cells in the BM of both groups (n = 4). The data are presented as the mean numbers ± SEM.

**Figure S4 The signaling pathway in human AMLs and murine AML.** (A and B) mTOR (A) and 4E-BP1 (B) mRNA expression in human AML cells with t(8;21)(AML1\_ETO), t(15;17)( APL), inv(16)/t(16;16) and t(11q23)/MLL using the HemaExplorer database. The data were analyzed using the Mann-Whitney U test. Significant differences are indicated with asterisks (\*, P < 0.05; \*\*, P < 0.01; \*\*\*, P < 0.001; \*\*\*\*, P < 0.0001). (C) KEGG analysis of the upregulated pathways in *Rheb1<sup>fl/fl</sup>* vs. *Rheb1<sup>Δ/Δ</sup>* GFP<sup>+</sup> cells. (D) KEGG analysis of downregulated pathways in *Rheb1<sup>fl/fl</sup>* vs. *Rheb1<sup>Δ/Δ</sup>* GFP<sup>+</sup> cells.

## **SUPPLEMENTARY METHODS**

### **LSC transplantation**

K<sup>+</sup>G<sup>-</sup> cells (LSCs) were sorted using a BD FACS Aria III flow sorter, and then transplanted into sub-lethally irradiated recipient mice. The survival status was observed and the survival curve was analyzed by Graphpad Prism 6.

### **Histological and pathological analysis**

For pathological analysis, spleen and liver were fixed with 4% formalin, embedded in paraffin, sectioned, and stained with hematoxylin and eosin.

### **Homing assay**

WBMCS were obtained and GFP<sup>+</sup> cells were sorted by Aria III flow cytometer. 1 ×10<sup>7</sup> BM GFP<sup>+</sup> cells were intravenously injected into lethally irradiated (9.5 Gy) recipient mice (CD45.1). The recipient mice were sacrificed to obtain WBMCS and spleen cells after 24 h, and these cells were then labeled for analyzing the number of GFP<sup>+</sup> cells by BD FACS LSRII flow cytometer.

### **Rapamycin dissolution**

Rapamycin (LC Lab) was dissolved in absolute ethanol at 10 mg/ml and stored at -80°C before use. The stock solution was added to the media at a final concentration of 5.45 nM/ml for all the experiments.

### **Western blotting analysis**

BM PMN cells were lysed and their proteins were extracted, separated and electrophoretically transferred to polyvinylidene difluoride membranes (Millipore). The membrane was blocked with 5% non-fat milk for 1 h, washed

for three times, then incubated with the primary antibodies ( $\beta$ -actin (8H10D10) Mouse mAb: CST; Rheb Rabbit antibody: Thermo Fisher) for 1 h at room temperature, and stay overnight at 4°C. After washing for three times the next day, the membrane was incubated with the relevant horseradish peroxidase-conjugated secondary antibodies (anti-rabbit/mouse IgG HRP-linked antibody: CST) for 1 h, then washed for three times. Finally, the reactive proteins were visualized with ImageQuant LAS4000. The density of each band was analyzed with Image J software and normalized with the control actin band.

**A**

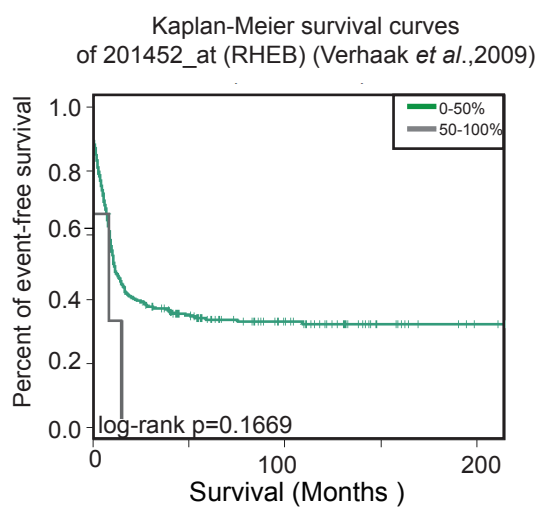

| Rheb1 expression | Median survival time |
|------------------|----------------------|
| 0-50%            | 11.47                |
| 50-100%          | 8.41                 |

**B**

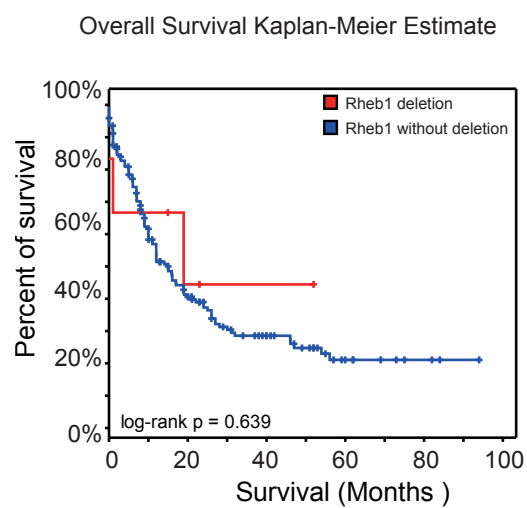

| AML (TCGA, Provisional)      | #Total cases | #Cases decreased | Median survival (months) |
|------------------------------|--------------|------------------|--------------------------|
| Cases with Rheb1 deletion    | 6            | 3                | 18.96                    |
| Cases without Rheb1 deletion | 171          | 111              | 15.01                    |

Figure S1

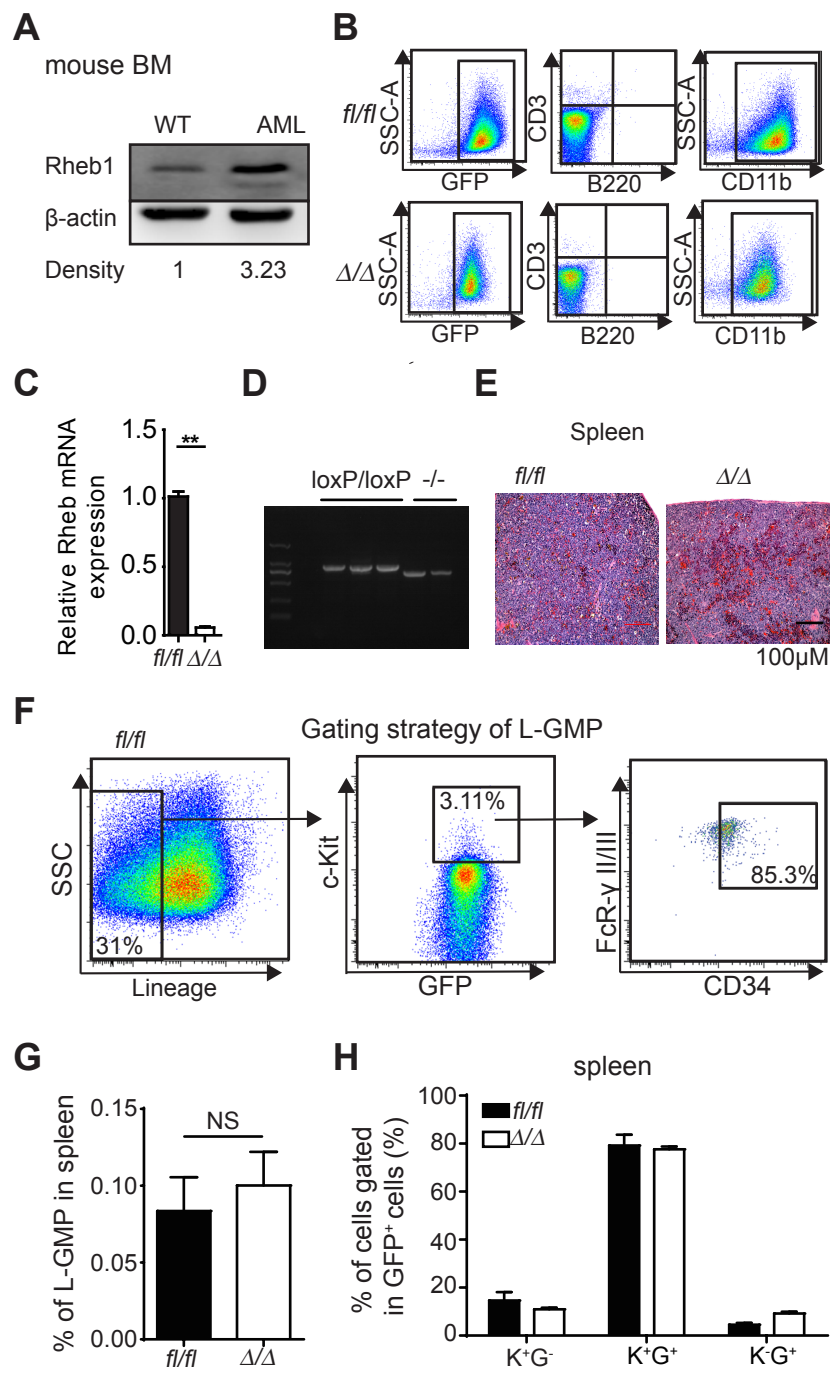

Figure S2

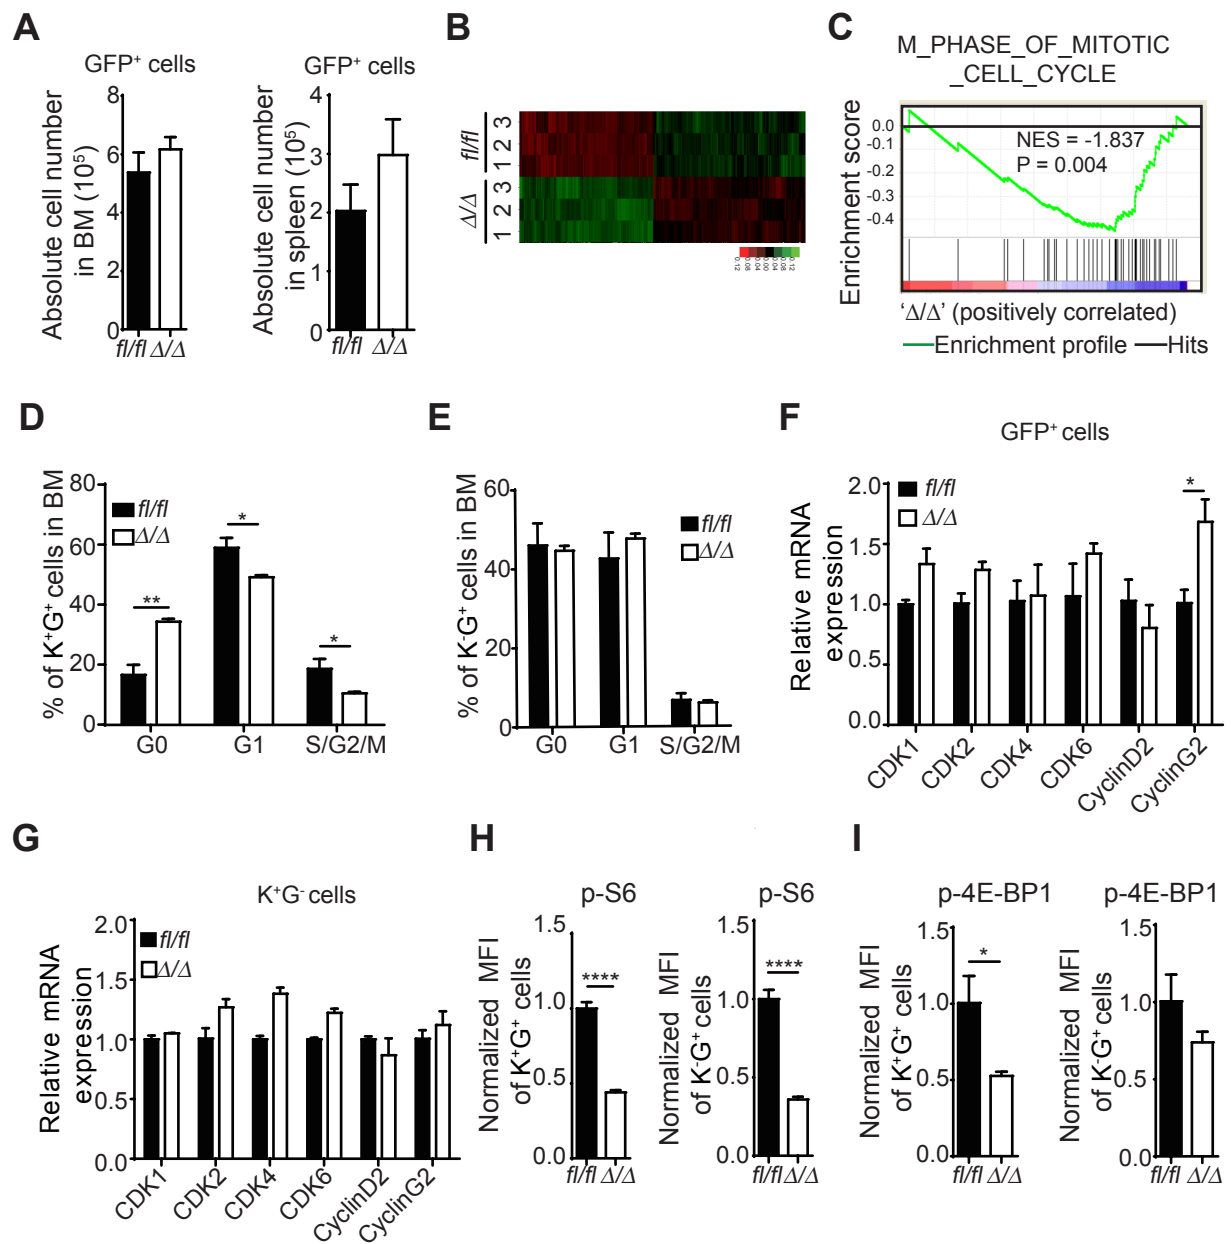

Figure S3

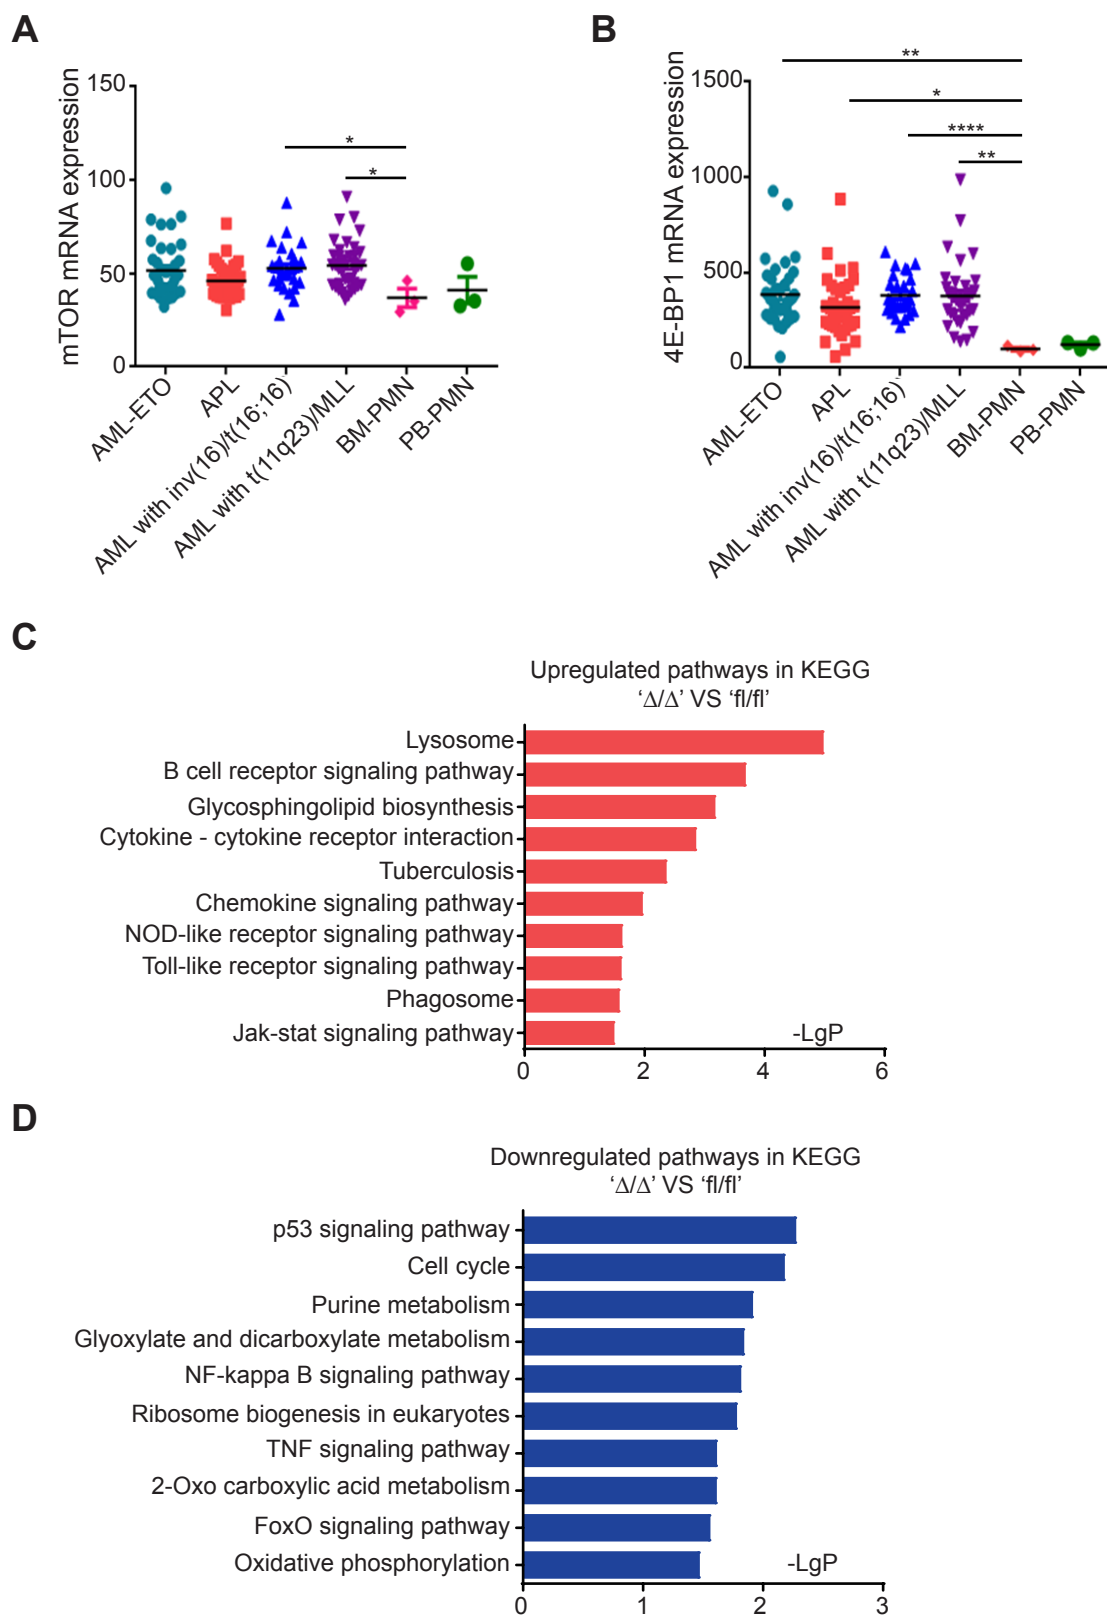

Figure S4

**Table S1 Primer sequence list**

| Primer       | Sequence (5'-3')      |                           |
|--------------|-----------------------|---------------------------|
|              | mouse                 |                           |
|              | Forward               | Reverse                   |
| <b>GAPDH</b> | TGTGTCCGTCGTGGATCTGA  | TTGCTGTTGAAGTCGCAGGA      |
| <b>Rheb1</b> | GTTACCAAGTTGATCACGGT  | ATATTCATCCTGCCCCGCTG      |
| <b>BAX</b>   | TGGAGCTGCAGAGGATGATTG | AGCTGCCACCCGGAAGA         |
| <b>Bim</b>   | TTGGAGCTCTGCGGTCCTT   | CAGCGGAGGTGGTGTGAAT       |
| <b>Puma</b>  | GCGGCGGAGACAAGAAGA    | AGTCCCATGAAGAGATTGTACATG  |
| <b>P53</b>   | AAGATCCGCGGGCGTAA     | CATCCTTTAACTCTAAGGCCTCATT |
| <b>Mcl-1</b> | CCCTCCCCCATCCTAATCAG  | AGTAACAATGGAAAGCATGCCAAT  |
| <b>P18</b>   | TACGAATTCATGGCCGAG    | TGGCTCGAGTCACTGCAGGCTT    |
|              | CCTTGGGGGA            | GTGGCT                    |
| <b>P19</b>   | AGGCCGGCAAATGATCATAGA | GGTGGATACCGGTGGACTGTG     |
| <b>P21</b>   | AATCCTGGTGATGTCCGACC  | TTGCAGAAGACCAATCTGCG      |
| <b>P27</b>   | TATGGAAGAAGCGAGTCAGC  | GCGAAGAAGAATCTTCTGCAG     |
| <b>P57</b>   | CAGCGGACGATGGAAGAACT  | CTACGCAACCATCTCCGGTT      |
| <b>CDK1</b>  | CAAAGCTGGCTGGGTTTCAC  | TCTGACCATGCAGAGCACAG      |
| <b>CDK2</b>  | AGGTGGAGAAGATTGGAGAGG | CCCGTCAACTTGTTTTTGGCT     |
| <b>CDK4</b>  | CCCTCTTCTCACTCTGCGTC  | TGCCAGAGATGGAGGAGTCT      |
| <b>CDK6</b>  | TGACACTGTGCACACATCAAA | AGACCAGTGAGGAGGGCAT       |

|                                 |                        |                         |
|---------------------------------|------------------------|-------------------------|
| <b>CyclinG2</b>                 | AGGGGTTTCAGCTTTTCGGATT | AGTGTTATCATTCTCCGGGGTAG |
| <b>CyclinD2</b>                 | GAGTGGGAACCTGGTAGTGTTG | CGCACAGAGCGATGAAGGT     |
| <b>SLC7A7</b>                   | CCACACCCATAACGCTGAGT   | TGCCCTCTAGCAAACACAGG    |
| <b>CD163</b>                    | TGCCTCTGCTGTCACTAACG   | TTCATTCATGCTCCAGCCGT    |
| <b>TGF <math>\beta</math> 1</b> | CTGCTGACCCCCACTGATAC   | AGCCCTGTATTCCGTCTCCT    |
| <b>MMP8</b>                     | AGCGCTTCTTCAGCTTAGCA   | GTCCACTTGGGACTTCCTGG    |
| <b>LTF</b>                      | TCCCGAAGCACGAATGACAA   | GGGAGGCAAAGAGCTGGAAT    |
| <b>HOXA9</b>                    | CCCCGACTTCAGTCCTTGC    | GATGCACGTAGGGGTGGTG     |
| <b>MEIS1</b>                    | CATGATAGACCAGTCCAACCGA | ATTGGCTGTCCATCAGGGTTA   |
| <b>Primer</b>                   | <b>human</b>           |                         |
|                                 | <b>Forward</b>         | <b>Reverse</b>          |
| <b>GAPDH</b>                    | GGTCGTATTGGGCGCCTGGTC  | TGACGGTGCCATGGAATTTGCCA |
| <b>Rheb1</b>                    | AGGGTCATGACGCAGCGAGT   | TGCGTCGGGGCGACGTTTTA    |
